# Supplementary material
Source: Hindawi journal article supplement (doi:10.1155/2011/576143)
Supplement: f1 [file 576143.f1.pdf]

## Supplementary data

Table 1SD: The table shows the sequence of primers for PCR amplification, the PCR annealing temperatures and dHPLC analysis temperatures for each amplicon.

| Amplicon | Primers                                                   | PCR T (°C) | dHPLC T (°C)           |
|----------|-----------------------------------------------------------|------------|------------------------|
| AMP0     | 5' CCTCGTGCTCCCTGTCAT 3'<br>5' CCACCGGTTCGGTGAC 3'        | 58         | 60.7<br>62.7<br>67.7°C |
| AMP1     | 5' CTGACGTCACCGAACCG 3'<br>5' AAACCCAGAATTCCCACCTC 3'     | 61         | 66.2<br>69.7°          |
| AMP2     | 5' GGAGAGACTCCCACCACGTA 3'<br>5' AGGTAGCGGTTCGACAGTGAT 3' | 55         | 61.5<br>65.0           |
| AMP3     | 5' TCTACTGGCCATCACTGTCG 3'<br>5' ATGGAGTTGTAGGTGGCAGG 3'  | 55         | 59.5<br>61.5<br>63.5   |
| AMP4     | 5' GCCCACTCTCCACCTCTCTA 3'<br>5' AGCTGGGCTGTGAGACATTT 3'  | 58         | 58.2<br>61.2           |

The GPR3 gene “promoter” and coding sequence were subdivided in 5 fragments (AMP0 to AMP4) and amplified by PCR with the primers indicated. PCR amplification settings were as follows: one cycle of 10 min at 95°C, followed by 35 cycles, with 30 sec at 94°C, 30sec of annealing at the temperature in the table and 45 sec at 72°C and a final cycle of 5 min at 72°C.

DHPLC analysis was performed at the temperatures indicated in the table for each amplicon.
